# Supplementary material for: A Review on Major Rust Resistance Gene and Amino Acid Changes on Wheat (Triticum aestivum L)
Source: Hindawi journal article supplement (doi:10.1155/2022/7419326), 2022-10-25
Supplement: f1 [file 7419326.f1.zip]

Archive with 4 entries (4 files):
- Figure S1 (1).docx
- Table S1.docx
- Table S2.docx
- Table S3.docx
