# Supplementary material for: A Review on Major Rust Resistance Gene and Amino Acid Changes on Wheat (Triticum aestivum L)
Source: Hindawi journal article supplement (doi:10.1155/2022/7419326), 2022-10-25
Supplement: f1 [file 7419326.f1.zip › Table S1.docx]

| S.N. | **SR genes** | **Chromosome Position** | **Derive From** | **Resistance type** | **References.** |
| --- | --- | --- | --- | --- | --- |
| 1 | *Sr2+Lr27+Yr30* | 3B | *Triticum aestivum Triticum turgidum* | APR | [12] |
| 2 | *SrPan3161* | 4D | Tugela | APR | [25] |
| 3 | *SrTm4 Am* | 2AmL | *Triticum monococcum* | APR | [87] |
| 4 | *Sr5* | 6DS | *Triticum aestivum* | APS-sus | [26] |
| 5 | *Sr6* | 2DS | *Triticum aestivum* | APS-sus | [93] |
| 6 | *Sr7a* | 4BL | *Triticum aestivum* | Aps-sus | [4][93] |
| 7 | *Sr7b* | 5BL | *Triticum aestivum* | APS-sus | [12] |
| 8 | *Sr8a* | 6AS | *Triticum aestivum* | Aps-sus | [94] |
| 9 | *Sr8b* | 2BL | *Triticum aestivum* | Aps-sus | [94] |
| 10 | *Sr9a* | 2BL | *Triticum aestivum* | Aps-sus | [22] |
| 11 | *Sr9b* | 2BL | Yaraslav parent | Aps-sus | [94] |
| 12 | *Sr9d* | 2BL | Kenya117A | Aps-sus | [12] |
| 13 | *Sr9e* | 2BL | *Triticum turgidum* | ASR | [89] |
| 14 | *Sr9g* | 2BL | *T. turgidum* | APR | [94] |
| 15 | *Sr10* | 2B | *Triticum aestivum* | APR | [93] |
| 16 | *Sr11* | 6BL | *Triticum aestivum* | SR | [95] |
| 17 | *Sr12* | 3BS | *T. turgidum (Iumillo durum)* | APR | [96] |
| 18 | *Sr13* | 6AL | *Triticum dicoccon, Triticum durum Triticum turgidum* | SR | [94] |
| 19 | *Sr14* | 1BL | *T. turgidum (Kaphli emmer)* | Aps-sus | [23][93] |
| 20 | *Sr15* | 7AL |  | SR | [88] |
| 21 | *Sr16* | 2BL | Thatcher | APS-sus | [97] |
| 22 | *Sr17* | 2AL | *T. turgidum* | APS-sus | [94] |
| 23 | *Sr18* | 1D | Marquis | APS | [97] |
| 24 | *Sr19* | 2BL | Marquis | APS-sus | [93] |
| 25 | *Sr20* | 2AL | *T. monococcum* | APS | [97] |
| 26 | *Sr21* | 7AL | *Triticum monococcum* | APS | [87] |
| 27 | *Sr22b (Sr2+Fhb1 rec)* | 7AL | *Triticum monococcum* | SR | [38] |
| 28 | *Sr23* | 7DL | *Triticum monococcum* | APR | [97] |
| 29 | *Sr24* | 2B | Egypt NA95 | ASR | [93] |
| 30 | *Sr25 (Sr2+Fhb1 rec)* | 7DL | *Agropyron elongatum* | SR | [23] |
| 31 | *Sr26 (Sr2+Fhb1 rec)* | 6AL | *Agropyron elongatum* | SR | [78] |
| 32 | *Sr27* | 3A | *Secale cereale* | SR | [23] |
| 33 | *Sr28* | 2BL | *Triticum aestivum* | SR | [93] |
| 34 | *Sr29* | 6DL | *Etiole de Choisy* | SR | [15] |
| 35 | *Sr30* | 2BL | *Triticum aestivum* | APS-sus | [22] |
| 36 | *Sr31* | 1RS | Petkus’ rye | ASR | [97] |
| 37 | *Sr32(Sr2+Fhb1 rec)* | 2A, 2B, 2D | *Aegilops speltoides* | ASR | [98] |
| 38 | *Sr33* | 1DS | *Aegilops tauschii* | ASR | [12] |
| 39 | *Sr34* | 2BS | *T. comosa* | ASR | [97] |
| 40 | *Sr35(Sr2+Fhb1 rec)* | 3AL | *Triticum monococcum* | SR | [90] |
| 41 | *Sr36* | 2A, 2B | *T. timopheevi* | ASR | [93] |
| 42 | *Sr37* | 4BL | *Triticum timopheevii* | SR | [23] |
| 43 | *Sr38* | 2A | VPM-1 | SR | [24] |
| 44 | *Sr39* | 2B | *Aegilops speltoides* | SR | [12] |
| 45 | *Sr40* | 2BS | *Triticum timopheevii ssp. Araraticum* | SR | [99] |
| 46 | *Sr41* | 4D | *Triticum aestivum* | ASR | [97] |
| 47 | *Sr42* | 6DS | *Triticum aestivum* | SR | [22] |
| 48 | *Sr44* | 7DS | *Thinopyrum intermedium* | SR | [78] |
| 49 | *Sr45* | 1DS | *Aegilops tauschii* | SR | [87] |
| 50 | *Sr46* | 2DS | *Aegilops tauschii* | SR | [100] |
| 51 | *Sr47* | 2BL | *Aegilops speltoides* | SR | [100] |
| 52 | *Sr50(Sr2+Fhb1 rec)* | 1RS | *rye cultivar* | SR | [15] |
| 53 | *Sr51* | 3AL | *Aegilops searsii* | SR | [23] |
| 54 | *Sr52* | 6AL | *Dasypyrum villosum* | SR | [100] |
| 55 | *Sr53* | 5DL | *Aegilops geniculata* | SR | [33] |
| 56 | *Sr55+Lr67+Yr46+Pm46* | 4DL | RL 6077 | APR | [100] |
| 57 | *Sr56* | 5BL | *Triticum aestivum* | APR | [100][95] |
| 58 | *Sr57+ Lr34+Yr18+Pm38* | 7DS | *Triticum aestivum* | APR(non race specific) | [23][12] |
| 59 | *Sr58+ Lr46+Yr29+Pm39* | 1BL | Pavon | APR | [23] |
| 60 | *Sr60* | 5AmS | *Triticum monococcum* | APR | [64] |
| 61 | *Sr61* | 6Ae#1 | *Hinopyrum ponticum* | ASR/SR | [78] |
| 62 | *Sr62* | 1BL/1DL | *Aegilops sharonensis* | ASR | [34] |
| 63 | *Sr63* | 1B/ 2A | *Triticum turgidum* | APR | [101] |
| 64 | *srR* | 1RS | Imperial’ rye | APR | [102] |
| 65 | *SrTA1662* | 6DS | *Aegilops tauschii* | APR | [25] |
| 66 | *SrTm5* | 7A | *Triticum monococcum* | APR | [38] |
| 67 | *Sr36* |  | *Triticum aestivum* | ASR | [94] |
| 68 | *SrWeb* | 2BL | *Triticum aestivum* | ASR | [22] |
| 69 | *SrWld-1* | 1AL.1RS | *Triticum aestivum* | APR | [93] |
