# Supplementary material for: A Review on Major Rust Resistance Gene and Amino Acid Changes on Wheat (Triticum aestivum L)
Source: Hindawi journal article supplement (doi:10.1155/2022/7419326), 2022-10-25
Supplement: f1 [file 7419326.f1.zip › Table S2.docx]

| **S.N.** | **Leaf rust resistance cloned gene** | **Chromosome Position** | **Derive From** | **Resistance type** | **References.** |
| --- | --- | --- | --- | --- | --- |
| 1 | *Lr1* | 5BL | *T. aestivum* | SR/ASR | [103] |
| 2 | *Lr2* | 7BL | *T. aestivum* | SR | [67] |
| 3 | *Lr2a-c* | 2DS | *T. aestivum* | SR | [100] |
| 4 | *Lr3* | 6BL | *T. aestivum* | SR | [104] |
| 5 | *LrZH84* | 1BL | *Zhou 8425B* | ASR | [31] |
| 6 | *Lr4-6* | 6RL & 7RL | *Secale ereal* L | SR | [100] |
| 7 | *Lr7* | - | *T. aestivum* | APR | [60] |
| 8 | *Lr8* | - | *T. aestivum* | SR | [44] |
| 9 | *Lr9* | 6BL | *Aegilops umbellulata* | ASR | [6] |
| 10 | *Lr10* | 1AS | *T. aestivum* | SR | [105] |
| 11 | *Lr11* | 2A | *T. aestivum* | SR | [106] |
| 12 | *Lr12* | 4B | *T. aestivum* | SR | [107] |
| 13 | *Lr13* | 2BS | *T. aestivum* | APR | [99] |
| 14 | *Lr14a-b* | 7BL | *durum wheat* | SR | [108] |
| 15 | *Lr15* | 2DS | *T. aestivum* | APR | [100] |
| 16 | *Lr16* | 2BS | *T. aestivum* | ASR | [109] |
| 17 | *Lr17a-b* | 2AS | *T. aestivum* | APR | [15] |
| 18 | *Lr18* | 5BL | *T. aestivum* | APR | [100] |
| 19 | *Lr19* | 7DL | *Agropyron elongatum* | SR | [110] |
| 20 | *Lr20* | 7AL | *T. aestivum* | APR | [111] |
| 21 | *Lr21* | 1DS | *T. tauschii* | APR | [100] |
| 22 | *Lr22a-b* | 2D | *T. tauschii* | SR | [112] |
| 23 | *Lr23* | 2BS | *durum wheat* | ASR | [94] |
| 24 | *Lr24* | 3DL | *Agropyron elongatum* | SR | [94] |
| 25 | *Lr25* | 4BS | *Secale Cereal Rosen* | APR | [100] |
| 26 | *Lr26* | 1BL/1RS. | *Secale Cereal Petkus* | ASR | [31] |
| 27 | *Lr27* | 3BS | *T. aestivum* |  | [94] |
| 28 | *Lr28* | 4AL | *Aegilops speltoides* | SR | [97] |
| 29 | *Lr29* | 7DL | *Agropyron elongatum* | APR | [97] |
| 30 | *Lr30* | 4AL | *T. aestivum* | SR | [32] |
| 31 | *Lr31* | 4BL | *T. aestivum* | SR | [94] |
| 32 | *Lr32* | 3DS | *T. tauschii* | APR | [100] |
| 33 | *Lr33* | 1BL | *T. aestivum* | SR/ASR | [37] |
| 34 | *Lr34* | 7DS | *T. aestivum* | APR | [56] |
| 35 | *Lr35* | 2B | *Aegilops speltoides* | APR | [46] |
| 36 | *Lr36* | 3BS/6BS | *Aegilops speltoides* | APR | [33] |
| 37 | *Lr37* | 2AS | *Aegilops ventricosa* | APR | [98] |
| 38 | *Lr38* | 6DL | *Agropyron intermedium* | APR | [113] |
| 39 | *Lr39* | 2DS | *T. tauschii* | ASR | [113] |
| 40 | *Lr40* |  | *T. aestivum* | APR | [103] |
| 41 | *Lr41* | 1D | *T. tauschii* | APR | [100] |
| 42 | *Lr42* | 1D | *T. tauschii* | ASR | [113] |
| 43 | *Lr43* | 7DS | *T. tauschii* | ASR | [100] |
| 44 | *Lr44* | 1B | *T. spelta* | APR | [37] |
| 45 | *Lr45* | T2AS | *Secale cereale* | ASR | [114] |
| 46 | *Lr46* | 1BL | *T. aestivum* | APR | [6] |
| 47 | *Lr47* | 7AS | *Aegilops speltoides* | APR | [112][113] |
| 48 | *Lr48* | 4BL | *T. aestivum* | APR | [99] |
| 49 | *Lr49* | 2AS | *T. aestivum* | APR | [15] |
| 50 | *Lr50* | 2BL | *T. monococcum* | SR | [115] |
| 51 | *Lr51* | 1BS | *Aegilops speltoides* | ASR | [100] |
| 52 | *Lr52* | 5B | *T. aestivum* | APR | [116] |
| 53 | *Lr53* | 6BS | *T. turgidum subsp. Dicoccoides* | APR | [112][33] |
| 54 | *Lr54* | 2DL | *Aegilops kotschyi* | APR | [100] |
| 55 | *Lr56* | 6AL | *Aegilops sharonensis* | ASR | [34] |
| 56 | *Lr57* | 5DS | *A. geniculata* | APR | [33] |
| 57 | *Lr58* | 2BL | *A. triuncialis* | ASR | [115] |
| 58 | *Lr59* | 1AL | *Aegilops peregrina* | ASR | [100] |
| 59 | *Lr60* | 1DS | *T. aestivum* | APR | [113] |
| 60 | *Lr61* | 6BS | *T. aestivum* | APR | [32] |
| 61 | *Lr62* | 6AS | *Aegilops neglecta* | ASR | [113] |
| 62 | *Lr63* | 5A | *T. monococcum* | SR | [113] |
| 63 | *Lr64* | 6AS | *Triticum aestivum L* | race-specific | [4] |
| 64 | *Lr65* | 2AS | *Triticum aestivum L* | race-specific | [98] |
| 65 | *Lr66* | 3AS | *Triticum aestivum L* | race-specific | [33] |
| 66 | *Lr67* | 4DL | *T. aestivum* | ASR | [9] |
| 67 | *Lr68* | 7L | *T. aestivum* | APR | [4] |
| 68 | *Lrac104* | 6B | *T. aestivum* | APR | [100] |
| 69 | *Lrac124* | 4A | *T. aestivum* | APR | [100] |
| 70 | *Lr69* |  |  |  |  |
| 71 | *Lr70* | 5DS | KU3198 | ASR | [116] |
| 72 | *Lr71* | 1BS | *spelt wheat cv. Altgold Rotkorn* | SR | [37] |
| 73 | *Lr72* | 7BS | *Triticum turgidum subsp. Durum* | APR | [117] |
| 74 | *Lr73* | 2BS | *T. aestivum* | SR | [111] |
| 75 | *Lr74* | 3BL | *Toropi wheat* | APR | [6] |
| 76 | *Lr76* | 5DL | *Aegilops umbellulata* | APR | [118] |
| 77 | *Lr77* | 3BL | Santa Fe | APR | [6] |
| 78 | *Lr78* | 5DS | Toropi Wheat | APR | [6] |
| 79 | *Lr79* | 3BL | durum wheat landrace Aus26582 | ASR | [6] |
| 80 | *Lr80* | 2DS | *T. monococcum* | SR | [119] |
| 81 | *LrX* | 1DS | *T. monococcum* | SR | [120] |
| 82 | *LrTM16* | 2A | *T. monococcum* | SR | [38] |
| 83 | *LrB1* | 3BS | Borlaug 100 | ASR | [6] |
| 84 | *LrB2* | 2AS | Borlaug 100 | ASR | [6] |
| 85 | *LrSV1-2* | 4BL/3BS | *Triticum aestivum* | APR |  |
| 86 | *LrTs276-2* | 1DS | *T. spelta 276* | BSR | [121] |
| 87 | *Lr2K38* | 1AL | AGS 2038 | APR |  |
| 88 | *LrZH84* | 1BL | Zhou 8425B | APR | [103] |
| 89 | *LrBi16* | 7BL | *Triticum aestivum* | APR | [110][108] |
| 92 | *LrG6* | 2BL | Buck Manantial and Sinvalocho MA | ASR | [100] |
| 93 | *LrFun* | 7BL | Thatcher | SR | [110] |
| 94 | *LrNJ97* | 1BL | Neijiang 977671 | APR | [115] |
| 95 | *Lr5R* | 3DL | 5R618 | SR | [120] |
| 96 | *LrAc* | 5DS | *Aegilops caudata* | ASR | [33] |
| 97 | *LrZH22* | 2BS | *T. aestivum* | ASR | [122] |
| 98 | *LrE1* | 7BL | *Zhoumai 22* | ASR | [67], [123] |
| 99 | *LrP* | 5DS | *Liaochun10* | ASR | [99] |
| 100 | *Lr.ace-4A* | 4AS | *Triticum turgidum L* | SR | [32] |
| 101 | *LrM* | 2AS | *Aegilops markgrafii* | ASR | [41] |
