# Supplementary material for: A Review on Major Rust Resistance Gene and Amino Acid Changes on Wheat (Triticum aestivum L)
Source: Hindawi journal article supplement (doi:10.1155/2022/7419326), 2022-10-25
Supplement: f1 [file 7419326.f1.zip › Table S3.docx]

| **S.N.** | **Stem rust resistance cloned gene** | **Chromosome Position** | **Derive From** | **Resistance type** | **References.** |
| --- | --- | --- | --- | --- | --- |
| 1 | *Yr1* | 2AL | *Triticum aestivum* | ASR | [124] |
| 2 | *YrA* | 3DL | *Australian cv. Avocet* | seedling resistance | [71] |
| 3 | *Yr2* | 7B | *Triticum aestivum* | ASR | [40] |
| 4 | *Yr2ks* | 7DS | *Shatabdi.* | APR | [15] |
| 5 | *YrTr1 & yrtr2* | 6D & 3A | *Triticum aestivum* |  | [7] |
| 6 | *Yr5* | 2B | *T. aestivum ssp. spelta var. album* | HTAP) (race specific) | [24] |
| 7 | *Yr3a-c* | 1B | *Triticum aestivum* | ASR | [106] |
| 8 | *Yr4a-b* | 6B | *Triticum aestivum* | ASR | [97] |
| 9 | *Yr6* | 7BS | *Triticum aestivum* | ASR | [40] |
| 10 | *Yr7* | 2BL | *T. turgidum ssp durum* | ASR | [100] |
| 11 | *Yr8* | 2D | *Triticum aestivum* | ASR | [7][106] |
| 12 | *Yr9* | (1RL. 1BS) | *Secale cereale* | ASR | [94][15] |
| 13 | *Yr10* | 1BS | *Triticum spelta* | ASR | [24] |
| 14 | *Yr11* | - | *Triticum aestivum* | APR(rs) | [125] |
| 15 | *Yr12* | - | *Triticum aestivum* | APR(rs) | [106] |
| 16 | *Yr13* | 2BS | *Triticum aestivum* | APR(rs) | [106][126] |
| 17 | *Yr14* | - | *Triticum aestivum* | APR(rs) | [126][127] |
| 18 | *Yr15* | 1BS | *Triticum dicoccoides* | ASR | [24] |
| 19 | *Yr16* | 2DL | *Triticum aestivum* | APR(rs) | [94][106] |
| 20 | *Yr17* | 2AS | *Aegilops ventricosa* | SR | [97] |
| 21 | *Yr18* | 7DS | *Triticum aestivum* | HTAPR (non specific) | [56][23][57] |
| 22 | *Yr19* | 5B | *Triticum aestivum* | APR | [15], [94], [125] |
| 23 | *Yr20* | 6D | *Triticum aestivum* | ASR | [125][97] |
| 24 | *Yr21* | 1B | *Triticum aestivum* | APR | [15] |
| 25 | *Yr22* | 4D | *Triticum aestivum* | APR | [7][15] |
| 26 | *Yr23* | 6D | *Triticum aestivum* | APR | [15][125] |
| 27 | *Yr24* | 6B | *Triticum aestivum* | APR | [128] |
| 28 | *Yr27* | 2BS | *Triticum aestivum* | ASR | [109] |
| 29 | *Yr28* | 4DS | *Triticum tauschii* | ASR | [97] |
| 30 | *Yr29* | 1BL | *Triticum aestivum* | APR | [6] |
| 31 | *Yr30* | 3BS | *Triticum aestivum* | APR | [6] |
| 31 | *Yr31* | 2BS | *Triticum aestivum* | ASR | [109] |
| 32 | *Yr32* | 2BS | *Triticum aestivum* | ASR | [129] |
| 33 | *Yr34* | 5AL |  | APR | [98] |
| 34 | *Yr36* | 6BS | *T. dicoccoides* | HTAPR | [12][55] |
| 35 | *Yr39* | 7BL |  | HTAPR(rs) | [125] |
| 36 | *Yr40* | 5DS | *A.geniculata* | ASR | [33][118] |
| 37 | *Yr41* | 2BS | *Triticum aestivum* | APR (rs) | [118] |
| 38 | *Yr42* | 6AL trans | *Aegilops neglecta* | ASR | [100] |
| 39 | *Yr43* | 2BL | *Triticum aestivum* | ASR | [7] |
| 40 | *Yr44* | 4BL | *Triticum aestivum* | ASR | [7] |
| 41 | *Yr45* | 3DL | *Triticum aestivum* | ASR | [24] |
| 42 | *Yr46* | 4DL | *Triticum aestivum* | APR | [9] |
| 43 | *Yr47* | 5BS | *Triticum aestivum* | APR | [42][130] |
| 44 | *Yr48* | 5AL | *Triticum aestivum* | APR | [25] |
| 45 | *Yr49* | 3DS | *Triticum aestivum* | APR(rs) | [25][127] |
| 46 | *Yr50* | 4BL | *Thinopyrum intermedium* | ASR | [127] |
| 47 | *Yr51* | 4AL |  | ASR | [98] |
| 47 | *Yr52* | 7BL | *Triticum aestivum* | HTAPR | [6] |
| 48 | *Yr53* | 2BL | *Triticum turgidum ssp. durum* | ASR | [106][126] |
| 49 | *Yr54* | 2DL | *Triticum aestivum* | APR | [123][131] |
| 50 | *Yr55* | 2DL | *Triticum aestivum* | ASR |  |
| 51 | *Yr56* | 2AS | *Triticum turgidum ssp. durum* | APR | [132] |
| 52 | *Yr57* | 3BS | *Triticum aestivum* | ASR | [18] |
| 53 | *Yr58* | 3BL | *Triticum aestivum* | ASR | [94] |
| 54 | *Yr59* | 7BL | *Triticum aestivum* | HTAPR | [132] |
| 55 | *Yr60* | 4AL | *Triticum aestivum* | ASR | [6] |
| 56 | *Yr61* | 7A | *Triticum aestivum* | ASR | [123] |
| 57 | *Yr62* | 4BL | *Triticum aestivum* | HTAPR | [94] |
| 58 | *Yr63* | 7BS | *Triticum aestivum* | ASR | [100] |
| 59 | *Yr64* | 1BS | *Triticum aestivum* | ASR | [7] |
| 60 | *Yr65* | 1BS | *Triticum turgidum ssp. durum* | ASR | [126][127] |
| 61 | *Yr66* | 3DS | *Triticum aestivum* | ASR | [42] |
| 62 | *Yr67* | 7BL | *Triticum aestivum* | ASR | [42] |
| 63 | *Yr68* | 4BL | *Triticum aestivum* | APR | [94][6][6] |
| 64 | *YrUmb.(Yr70)* | 5DS | *Aegilops umbellulata* | APR | [97] |
| 65 | *Yr71* | 3DL | *Triticum aestivum* | APR | [6] |
| 66 | *Yr75* | 7AL | *Triticum aestivum* | SR | [6] |
| 67 | *YrCf75* | 2AL | *Changfeng 75* | ASR | [96] |
| 68 | *Yr77* | 6DS | *Triticum aestivum* | APR | [94] |
| 69 | *Yr78* | 6BS | *Triticum aestivum* | APR | [6] |
| 70 | *Yr79* | 7BL | *Triticum aestivum* | APR | [6] |
| 71 | *Yr80* | 3BL | *Triticum aestivum* | HTAPR | [133] |
| 72 | *Yr82* | 3BL | *Triticum aestivum* | APR | [6] |
| 73 | *YrZH84* | 7BL | Zhou 8425B | APR | [40] |
| 74 | *YrSP* | 2BL | ‘Spaldings Prolific | ASR | [7][6] |
| 75 | *YrVL* | 2BL | VL404 | SR | [113][98] |
| 76 | *YrSF* | 5BS | Sifangmai | APR | [99] |
| 77 | *YrTres* |  | DH population | APR | [18] |
| 78 | *YrJ22* | 2AL | jimai 22 | SR | [123] |
| 79 | *YrSD* | - | *Triticum aestivum* | SR | [18] |
| 80 | *YrZM175* | 2A. | *Triticum turgidum* | APR | [134] |
| 81 | *YrND* | - | *DH population* | APR | [18] |
| 82 | *Yr40-CAPS16* | 5DS | *A. geniculata* | APR | [118] |
| 83 | *(QTL2A.K)* | 2A | *Aegilops squarrosa* | ASR | [126] |
| 84 | *QYr.cim* | 3DC/*2DS* | *Triticum aestivum* | APR | [135] |
| 85 | *QYr.hbaas* | 7BL/*2BL/4DL/3BS* | *Triticum aestivum L* | APR | [136] |
| 96 | *QYr.sgi* | 7D | *Triticum aestivum* | APR | [137] |
| 87 | *QYr.caas-* | 2BL/*5AL/6BS* | Pingyuan 50 | APR | [138] |
| 88 | *QYr.orr-* | 7A/ -4AL | Stephens | APR | [130] |
| 90 | *QYr.jki* | 6A | DH population | APR | [18] |
| 91 | *QYraq.cau* | 2BL_ | Aquileja | APR | [130] |
| 92 | *Qyr.pnw.R* | 2BL | Panel-2 | APR | [139] |
| 93 | *qYr.A* |  | DH population | APR |  |
| 94 | *QYr.inra* | 5BL/ -7A | Dedryver | APR | [113][123] |
| 95 | *Qyr.wpg* | 4B.1 | DH population | APR | [18] |
| 96 | *QYr.sgi* | 7D | Kariega | APR | [137] |
| 97 | *QYr.jki* | 2B.2 | VPM1 | APR | [98] |
| 99 | *Yr50* | 4BL, | *T. intermedium* | APR | [127] |
| 100 | *Yr56* | 2AS | *Triticum aestivum* | ASR | [132] |
| 101 | *Yr58* | 3BS | *Triticum aestivum* | APR | [94] |
| 102 | *Yr8* | 2D | *Aegilops comosa* | APR | [106][15] |
| 103 | *Yr26* | 6AS | Haynaldia villosa | APR | [128] |
| 104 | *Yr20* | 6D | *Triticum aestivum* | APR | [6] |
| 105 | *Yr4* | 3BS | *Rubric* | ASR | [94] |
| 106 | *Yraci.* | 1A | *Acienda’* | APR | [35] |
| 107 | *YrTp1* | 2BS | *Thinopyrum ponticum* | APR | [16] |
| 108 | *YrAS2388R* | 4DS | *Aegilops tauschii* | Seedling stage. | [71] |
