# Supplementary figures and images for: A Review on Major Rust Resistance Gene and Amino Acid Changes on Wheat (Triticum aestivum L)
Source: Hindawi journal article supplement (doi:10.1155/2022/7419326), 2022-10-25

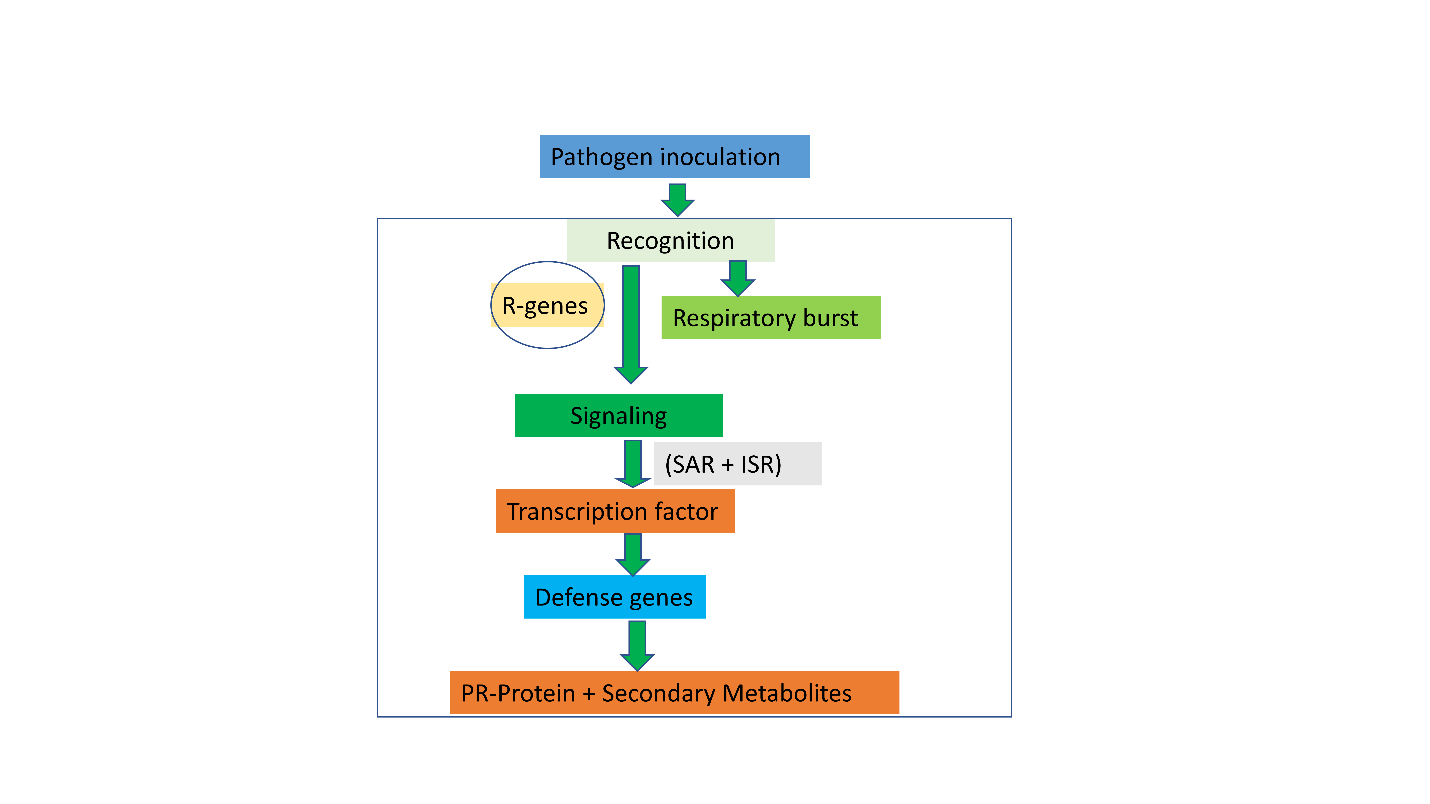

Supplement: f1 [file 7419326.f1.zip › Figure S1 (1).docx]
